# Supplementary material for: Integrative in-silico analysis on phytocompounds of Pajanelia longifolia against hepatocellular carcinoma: gene network target identification, molecular docking, simulation and ADMET profiling
Source: Research Square preprint supplement (doi:10.21203/rs.3.rs-7782064/v1), 2025-11-05
Supplement: Supplementary file 1 [file d5ad60bc99b485a711925907.docx]

| Hub genes | PDB ID | Coordinates | Radius (Å) |
| --- | --- | --- | --- |
| BUB1 | 5DMZ | X: -15.43; Y: 1.72; Y: -40.80 | 15 |
| BUB1B | 2WVI | X: 46.43 Y: 12.89; Z: 83.98 | 15 |
| CCNA2 | 7MKX | X: -44.97; Y: 29.98; Z: -37.25 | 15 |
| CCNB1 | 2B9R | X: -44.97; Y: 29.98; Z: 41.65 | 15 |
| CDK1 | 4Y72 | X: 29.36; Y: -71.90; Z: 184.66 | 15 |
| KIF11 | 3K5E | X: 21.75; Y: 4.10; Z: 21.03 | 15 |
